# Supplementary material
Source: publisher site journal article supplement (https://www.spandidos-publications.com/5817/downloadSupplementary)
Supplement: Supplementary file 1 [file downloadSupplementary]

**Table SI.** Clinical information of the seven glioma cases.

| <b>Case no.</b> | <b>WHO grade</b> | <b>Sex</b> | <b>Age, years</b> |
|-----------------|------------------|------------|-------------------|
| 1               | GBM              | M          | 36                |
| 2               | III              | F          | 64                |
| 3               | III              | M          | 52                |
| 4               | II               | M          | 45                |
| 5               | III              | M          | 57                |
| 6               | GBM              | M          | 49                |
| 7               | GBM              | M          | 66                |

The age range and median age were 36 to 66 years and 52.7 years, respectively.  
WHO, World Health Organization; GBM: glioblastoma; M, male; F, female.
